# Supplementary material
Source: PubMed Central journal article supplement (PMC5454513)
Supplement: supp_M075457_jlr.M075457-1.pdf [file supp_M075457_jlr.M075457-1.pdf]

SUPPLEMENTAL DATA

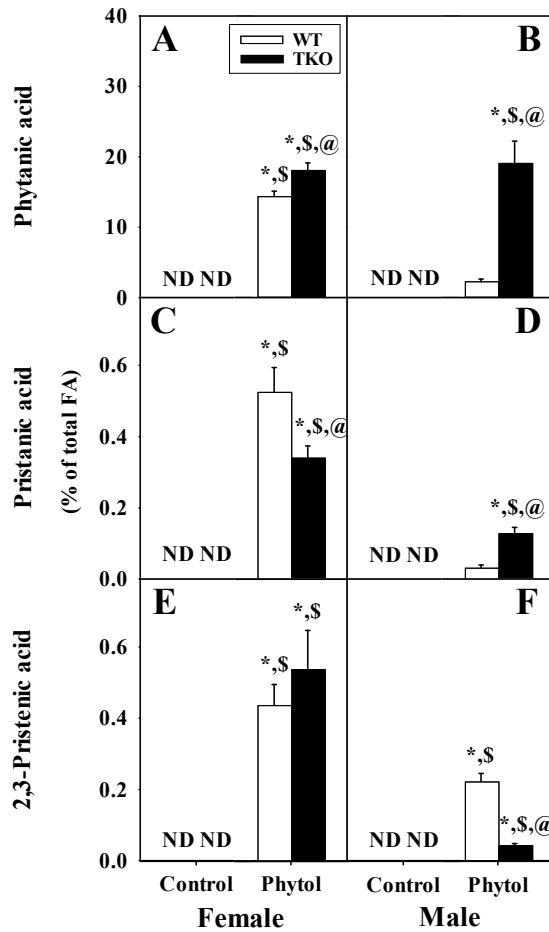

**Supplemental Figure 1: Relative proportion of phytol metabolites as percent of total fatty acid content.** Female (panels A, C, and E) and male (panels B, D, and F) wild-type (WT) (white bars) and *Fabp1/Scp-2/Scp-x* null (triple knockout; TKO) (black bars) mice were fed control or 0.5% phytol-supplemented chow. Liver lipids were extracted and phytol metabolites quantitated by GLC-mass spectrometry as described in Methods. Phytanic acid (panels A and B), pristanic acid (panels C and D), and  $\Delta$ 2,3-pristenic acid (panels E and F) were expressed as % of total hepatic fatty acids. Values represent the mean percent of total liver FA  $\pm$  SE (n=4-6); ND = not detected; \* =  $P \leq 0.05$  versus WT Control-diet; \$ =  $P \leq 0.05$  versus TKO Control-diet; @ =  $P \leq 0.05$  versus WT Phytol-diet.
