# Supplementary material
Source: PubMed Central journal article supplement (PMC5454513)
Supplement: supp_M075457_jlr.M075457-3.pdf [file supp_M075457_jlr.M075457-3.pdf]

Supplementary Table 1: Female Liver Fatty Acid Mass (nmol FA/mg protein)

|               | Control        |                           | Phytol                        |                                 |
|---------------|----------------|---------------------------|-------------------------------|---------------------------------|
|               | WT             | TKO                       | WT                            | TKO                             |
| Fatty acid    | nmol/mg ± SE   | nmol/mg ± SE              | nmol/mg ± SE                  | nmol/mg ± SE                    |
| 12-0          | 9.66 ± 0.65    | 9.69 ± 1.04               | 9.77 ± 0.82                   | 9.84 ± 0.87                     |
| 14-0          | 5.40 ± 0.75    | 2.24 ± 0.21               | 23.75 ± 1.33 <sup>*,§</sup>   | 7.22 ± 0.56 <sup>*,@</sup>      |
| pristanic     | ND             | ND                        | 10.22 ± 1.33 <sup>*,§</sup>   | 6.85 ± 0.66 <sup>*,§,@</sup>    |
| 16-0          | 237.76 ± 24.43 | 189.38 ± 22.33            | 448.77 ± 22.69 <sup>*,§</sup> | 410.24 ± 32.86 <sup>*,§</sup>   |
| 16-1          | 31.78 ± 3.73   | 14.63 ± 2.42 <sup>*</sup> | 29.62 ± 1.82 <sup>*</sup>     | 23.09 ± 3.77                    |
| phytanic      | ND             | ND                        | 279.48 ± 14.64 <sup>*,§</sup> | 363.56 ± 21.07 <sup>*,§,@</sup> |
| 18-0          | 214.59 ± 45.29 | 136.24 ± 8.89             | 366.06 ± 35.99 <sup>*,§</sup> | 378.19 ± 44.66 <sup>*,§</sup>   |
| 18-1          | 278.80 ± 16.72 | 209.59 ± 15.99            | 217.32 ± 20.35                | 219.14 ± 18.15                  |
| 18-2          | 193.74 ± 11.62 | 145.64 ± 11.11            | 328.70 ± 30.77 <sup>*,§</sup> | 331.46 ± 27.45 <sup>*,§</sup>   |
| 2,3 pristenic | ND             | ND                        | 8.50 ± 1.12 <sup>*,§</sup>    | 10.81 ± 2.17 <sup>*,§</sup>     |
| 20-1          | 5.90 ± 0.58    | 5.27 ± 0.54               | 20.42 ± 1.25 <sup>*,§</sup>   | 25.99 ± 3.11 <sup>*,§,@</sup>   |
| 20-2          | 0.96 ± 0.13    | 0.74 ± 0.10               | 1.09 ± 0.11                   | 1.62 ± 0.24 <sup>*,§,@</sup>    |
| 20-3          | 10.33 ± 0.68   | 10.96 ± 0.72              | 17.85 ± 0.93 <sup>*,§</sup>   | 28.48 ± 2.86 <sup>*,§,@</sup>   |
| 20-4          | 76.11 ± 6.14   | 73.14 ± 5.49              | 80.23 ± 3.74                  | 69.76 ± 7.53                    |
| 22-1          | 2.63 ± 0.11    | 1.51 ± 0.13 <sup>*</sup>  | 0.11 ± 0.02 <sup>*,§</sup>    | 3.67 ± 0.17 <sup>*,§,@</sup>    |
| 22-4          | 3.33 ± 0.40    | 2.44 ± 0.25               | 7.87 ± 0.75 <sup>*,§</sup>    | 1.92 ± 0.45 <sup>@</sup>        |
| 24-0          | 0.76 ± 0.07    | 0.44 ± 0.04               | 2.74 ± 0.29 <sup>*,§</sup>    | 3.20 ± 0.22 <sup>*,§</sup>      |
| 24-1          | 4.85 ± 0.73    | 6.20 ± 0.72               | 23.09 ± 2.24 <sup>*,§</sup>   | 34.29 ± 2.67 <sup>*,§,@</sup>   |
| 22-6          | 23.27 ± 1.90   | 15.95 ± 1.09 <sup>*</sup> | 37.42 ± 2.15 <sup>*,§</sup>   | 31.57 ± 2.70 <sup>*,§</sup>     |

\* = P<0.05 when compared to WT control

§ = P<0.05 when compared to TKO control

@ = P<0.05 when compared to WT phytol
