# Supplementary material
Source: PubMed Central journal article supplement (PMC5454513)
Supplement: supp_M075457_jlr.M075457-4.pdf [file supp_M075457_jlr.M075457-4.pdf]

Supplementary Table 2: Female Liver Fatty Acid Composition (% total FA)

| Fatty acid    | Control             |                     | Phytol               |                        |
|---------------|---------------------|---------------------|----------------------|------------------------|
|               | WT                  | TKO                 | WT                   | TKO                    |
|               | % of total $\pm$ SE | % of total $\pm$ SE | % of total $\pm$ SE  | % of total $\pm$ SE    |
| 12-0          | 0.88 $\pm$ 0.06     | 1.19 $\pm$ 0.08*    | 0.50 $\pm$ 0.04*,\$  | 0.49 $\pm$ 0.04*,\$    |
| 14-0          | 0.49 $\pm$ 0.07     | 0.29 $\pm$ 0.04     | 1.22 $\pm$ 0.07*,\$  | 0.36 $\pm$ 0.03@       |
| pristanic     | ND                  | ND                  | 0.53 $\pm$ 0.07*,\$  | 0.34 $\pm$ 0.03*,\$,@  |
| 16-0          | 21.62 $\pm$ 2.22    | 21.81 $\pm$ 1.98    | 23.06 $\pm$ 1.17     | 20.42 $\pm$ 1.64       |
| 16-1          | 2.89 $\pm$ 0.34     | 1.60 $\pm$ 0.23*    | 1.52 $\pm$ 0.09*     | 1.15 $\pm$ 0.19*       |
| phytanic      | ND                  | ND                  | 14.36 $\pm$ 0.75*,\$ | 18.09 $\pm$ 1.05*,\$,@ |
| 18-0          | 19.51 $\pm$ 4.13    | 18.09 $\pm$ 1.18    | 20.21 $\pm$ 2.21     | 20.74 $\pm$ 2.45       |
| 18-1          | 25.35 $\pm$ 1.52    | 25.26 $\pm$ 1.93    | 11.16 $\pm$ 1.05*,\$ | 10.91 $\pm$ 0.90*,\$   |
| 18-2          | 17.61 $\pm$ 1.06    | 17.55 $\pm$ 1.34    | 16.89 $\pm$ 1.58     | 16.49 $\pm$ 1.37       |
| 2,3 pristenic | ND                  | ND                  | 0.44 $\pm$ 0.09*,\$  | 0.54 $\pm$ 0.11*,\$    |
| 20-1          | 0.54 $\pm$ 0.05     | 0.63 $\pm$ 0.07     | 1.09 $\pm$ 0.08*,\$  | 1.29 $\pm$ 0.16*,\$    |
| 20-2          | 0.09 $\pm$ 0.01     | 0.09 $\pm$ 0.01     | 0.06 $\pm$ 0.01      | 0.09 $\pm$ 0.02        |
| 20-3          | 0.94 $\pm$ 0.06     | 1.32 $\pm$ 0.09*    | 0.92 $\pm$ 0.05\$    | 1.41 $\pm$ 0.15*,@     |
| 20-4          | 6.92 $\pm$ 0.56     | 8.81 $\pm$ 0.66*    | 4.12 $\pm$ 0.19*,\$  | 3.47 $\pm$ 0.38*,\$    |
| 22-1          | 0.24 $\pm$ 0.01     | 0.18 $\pm$ 0.02*    | 0.10 $\pm$ 0.01*,\$  | 0.14 $\pm$ 0.014*,\$,@ |
| 22-4          | 0.30 $\pm$ 0.04     | 0.29 $\pm$ 0.03     | 0.42 $\pm$ 0.06      | 0.19 $\pm$ 0.05@       |
| 24-0          | 0.07 $\pm$ 0.01     | 0.05 $\pm$ 0.01     | 0.14 $\pm$ 0.02*,\$  | 0.16 $\pm$ 0.01*,\$    |
| 24-1          | 0.44 $\pm$ 0.06     | 0.67 $\pm$ 0.08     | 1.06 $\pm$ 0.10*,\$  | 1.53 $\pm$ 0.11*,\$,@  |
| 22-6          | 2.12 $\pm$ 0.17     | 2.14 $\pm$ 0.15     | 2.21 $\pm$ 0.17      | 2.19 $\pm$ 0.15        |

\* = P<0.05 when compared to WT control

\$ = P<0.05 when compared to TKO control

@ = P<0.05 when compared to WT phytol
