# Supplementary material
Source: PubMed Central journal article supplement (PMC5454513)
Supplement: supp_M075457_jlr.M075457-5.pdf [file supp_M075457_jlr.M075457-5.pdf]

Supplementary Table 3: Male Liver Fatty Acid Mass (nmol FA/mg protein)

|               | Control        |                           | Phytol                        |                                 |
|---------------|----------------|---------------------------|-------------------------------|---------------------------------|
|               | WT             | TKO                       | WT                            | TKO                             |
| Fatty acid    | nmol/mg ± SE   | nmol/mg ± SE              | nmol/mg ± SE                  | nmol/mg ± SE                    |
| 12-0          | 4.94 ± 0.49    | 5.95 ± 0.35               | 4.82 ± 0.27                   | 6.61 ± 0.81                     |
| 14-0          | 3.17 ± 0.14    | 1.93 ± 0.31               | 6.41 ± 0.40 <sup>*,§</sup>    | 6.58 ± 0.51 <sup>*,§</sup>      |
| Pristanic     | ND             | ND                        | 0.34 ± 0.08                   | 1.90 ± 0.24 <sup>*,§,@</sup>    |
| 16-0          | 156.00 ± 9.69  | 172.63 ± 19.51            | 305.21 ± 17.66 <sup>*,§</sup> | 313.69 ± 10.93 <sup>*,§</sup>   |
| 16-1          | 23.54 ± 3.46   | 18.66 ± 2.44              | 48.83 ± 4.74 <sup>*,§</sup>   | 28.39 ± 3.01 <sup>@</sup>       |
| Phytanic      | ND             | ND                        | 24.00 ± 3.60                  | 280.74 ± 46.27 <sup>*,§,@</sup> |
| 18-0          | 111.66 ± 11.88 | 125.00 ± 11.10            | 138.88 ± 10.51                | 270.92 ± 26.81 <sup>*,§,@</sup> |
| 18-1          | 128.47 ± 8.31  | 143.42 ± 12.39            | 195.11 ± 10.71 <sup>*</sup>   | 181.92 ± 24.57                  |
| 18-2          | 105.96 ± 6.86  | 118.29 ± 10.22            | 208.84 ± 11.47 <sup>*,§</sup> | 194.72 ± 26.29 <sup>*,§</sup>   |
| 2,3 pristenic | ND             | ND                        | 2.33 ± 0.23 <sup>*,§</sup>    | 0.64 ± 0.09 <sup>*,§,@</sup>    |
| 20-1          | 5.97 ± 0.39    | 8.02 ± 0.61               | 14.83 ± 0.99 <sup>*,§</sup>   | 17.88 ± 1.33 <sup>*,§,@</sup>   |
| 20-2          | 0.65 ± 0.07    | 0.90 ± 0.20               | 1.52 ± 0.16 <sup>*,§</sup>    | 1.66 ± 0.20 <sup>*,§</sup>      |
| 20-3          | 10.10 ± 0.22   | 17.08 ± 1.15 <sup>*</sup> | 15.47 ± 1.47 <sup>*</sup>     | 30.52 ± 2.18 <sup>*,§,@</sup>   |
| 20-4          | 80.56 ± 6.70   | 92.34 ± 5.42              | 60.97 ± 6.35 <sup>§</sup>     | 64.88 ± 6.95 <sup>§</sup>       |
| 22-0          | 0.07 ± 0.014   | 0.08 ± 0.01               | 0.16 ± 0.03                   | 1.26 ± 0.24 <sup>*,§,@</sup>    |
| 22-1          | 0.35 ± 0.052   | 0.45 ± 0.05               | 0.87 ± 0.06 <sup>*,§</sup>    | 2.72 ± 0.13 <sup>*,§,@</sup>    |
| 22-3          | 2.38 ± 0.20    | 1.47 ± 0.10 <sup>*</sup>  | 1.62 ± 0.15 <sup>*</sup>      | 0.79 ± 0.15 <sup>*,§,@</sup>    |
| 22-4          | 2.65 ± 0.23    | 2.28 ± 0.20               | 3.10 ± 0.28                   | 7.69 ± 1.05 <sup>*,§,@</sup>    |
| 24-0          | 0.47 ± 0.05    | 0.47 ± 0.05               | 0.78 ± 0.07 <sup>*,§</sup>    | 1.78 ± 0.14 <sup>*,§,@</sup>    |
| 24-1          | 3.79 ± 0.27    | 3.74 ± 0.44               | 3.30 ± 0.32                   | 22.14 ± 3.71 <sup>*,§,@</sup>   |
| 22-6          | 14.37 ± 1.41   | 13.43 ± 1.12              | 12.36 ± 1.40                  | 34.25 ± 3.93 <sup>*,§,@</sup>   |

\* = P<0.05 when compared to WT control

§ = P<0.05 when compared to TKO control

@ = P<0.05 when compared to WT phytol
