# Supplementary material
Source: PubMed Central journal article supplement (PMC5454513)
Supplement: supp_M075457_jlr.M075457-6.pdf [file supp_M075457_jlr.M075457-6.pdf]

Supplementary Table 4: Male Liver Fatty Acid Composition (% total FA)

| Fatty acid    | Control         |                          | Phytol                     |                               |
|---------------|-----------------|--------------------------|----------------------------|-------------------------------|
|               | WT              | TKO                      | WT                         | TKO                           |
|               | % of total ± SE | % of total ± SE          | % of total ± SE            | % of total ± SE               |
| 12-0          | 0.75 ± 0.08     | 0.82 ± 0.05              | 0.46 ± 0.02 <sup>*,§</sup> | 0.45 ± 0.05 <sup>*,§</sup>    |
| 14-0          | 0.48 ± 0.02     | 0.27 ± 0.04 <sup>*</sup> | 0.61 ± 0.04 <sup>*,§</sup> | 0.45 ± 0.03 <sup>§,@</sup>    |
| Pristanic     | ND              | ND                       | 0.03 ± 0.01                | 0.13 ± 0.02 <sup>*,§,@</sup>  |
| 16-0          | 23.81 ± 1.48    | 23.77 ± 2.69             | 29.08 ± 1.68               | 21.31 ± 0.74 <sup>@</sup>     |
| 16-1          | 3.59 ± 0.53     | 2.57 ± 0.34              | 4.65 ± 0.45 <sup>§</sup>   | 1.93 ± 0.21 <sup>@</sup>      |
| Phytanic      | ND              | ND                       | 2.29 ± 0.34                | 19.08 ± 3.14 <sup>*,§,@</sup> |
| 18-0          | 17.04 ± 1.81    | 17.21 ± 1.53             | 13.23 ± 1.00               | 18.41 ± 1.82                  |
| 18-1          | 19.61 ± 1.27    | 19.75 ± 1.71             | 18.59 ± 1.02               | 12.36 ± 1.67 <sup>*,§,@</sup> |
| 18-2          | 16.17 ± 1.05    | 16.29 ± 1.41             | 19.89 ± 1.09               | 13.23 ± 1.79 <sup>@</sup>     |
| 2,3 pristenic | ND              | ND                       | 0.22 ± 0.02 <sup>*,§</sup> | 0.04 ± 0.01 <sup>*,§,@</sup>  |
| 20-1          | 0.91 ± 0.06     | 1.10 ± 0.09              | 1.41 ± 0.09 <sup>*</sup>   | 1.21 ± 0.09                   |
| 20-2          | 0.10 ± 0.01     | 0.12 ± 0.03              | 0.14 ± 0.02                | 0.11 ± 0.01                   |
| 20-3          | 1.54 ± 0.04     | 2.35 ± 0.16 <sup>*</sup> | 1.47 ± 0.14 <sup>§</sup>   | 2.07 ± 0.15 <sup>*,@</sup>    |
| 20-4          | 12.30 ± 1.02    | 12.72 ± 0.75             | 5.81 ± 0.60 <sup>*,§</sup> | 4.41 ± 0.47 <sup>*,§</sup>    |
| 22-0          | 0.01 ± 0.01     | 0.01 ± 0.01              | 0.02 ± 0.01                | 0.09 ± 0.01 <sup>*,§,@</sup>  |
| 22-1          | 0.05 ± 0.01     | 0.06 ± 0.01              | 0.08 ± 0.01 <sup>*</sup>   | 0.19 ± 0.01 <sup>*,§,@</sup>  |
| 22-3          | 0.36 ± 0.03     | 0.20 ± 0.01 <sup>*</sup> | 0.15 ± 0.02 <sup>*</sup>   | 0.05 ± 0.01 <sup>*,§,@</sup>  |
| 22-4          | 0.40 ± 0.04     | 0.31 ± 0.03              | 0.29 ± 0.03                | 0.52 ± 0.07 <sup>§,@</sup>    |
| 24-0          | 0.07 ± 0.01     | 0.06 ± 0.01              | 0.07 ± 0.01                | 0.12 ± 0.01 <sup>*,§,@</sup>  |
| 24-1          | 0.58 ± 0.04     | 0.52 ± 0.06              | 0.31 ± 0.03                | 1.50 ± 0.25 <sup>*,§,@</sup>  |
| 22-6          | 2.19 ± 0.22     | 1.85 ± 0.15              | 1.18 ± 0.13 <sup>*</sup>   | 2.33 ± 0.27 <sup>@</sup>      |

\* = P<0.05 when compared to WT control

§ = P<0.05 when compared to TKO control

@ = P<0.05 when compared to WT phytol
